# Supplementary material for: Molecular mechanisms of fentanyl mediated β-arrestin biased signaling
Source: PubMed Central journal article supplement (PMC7176292; doi:10.1371/journal.pcbi.1007394), 2020-04-10

S6 Fig.

**a**

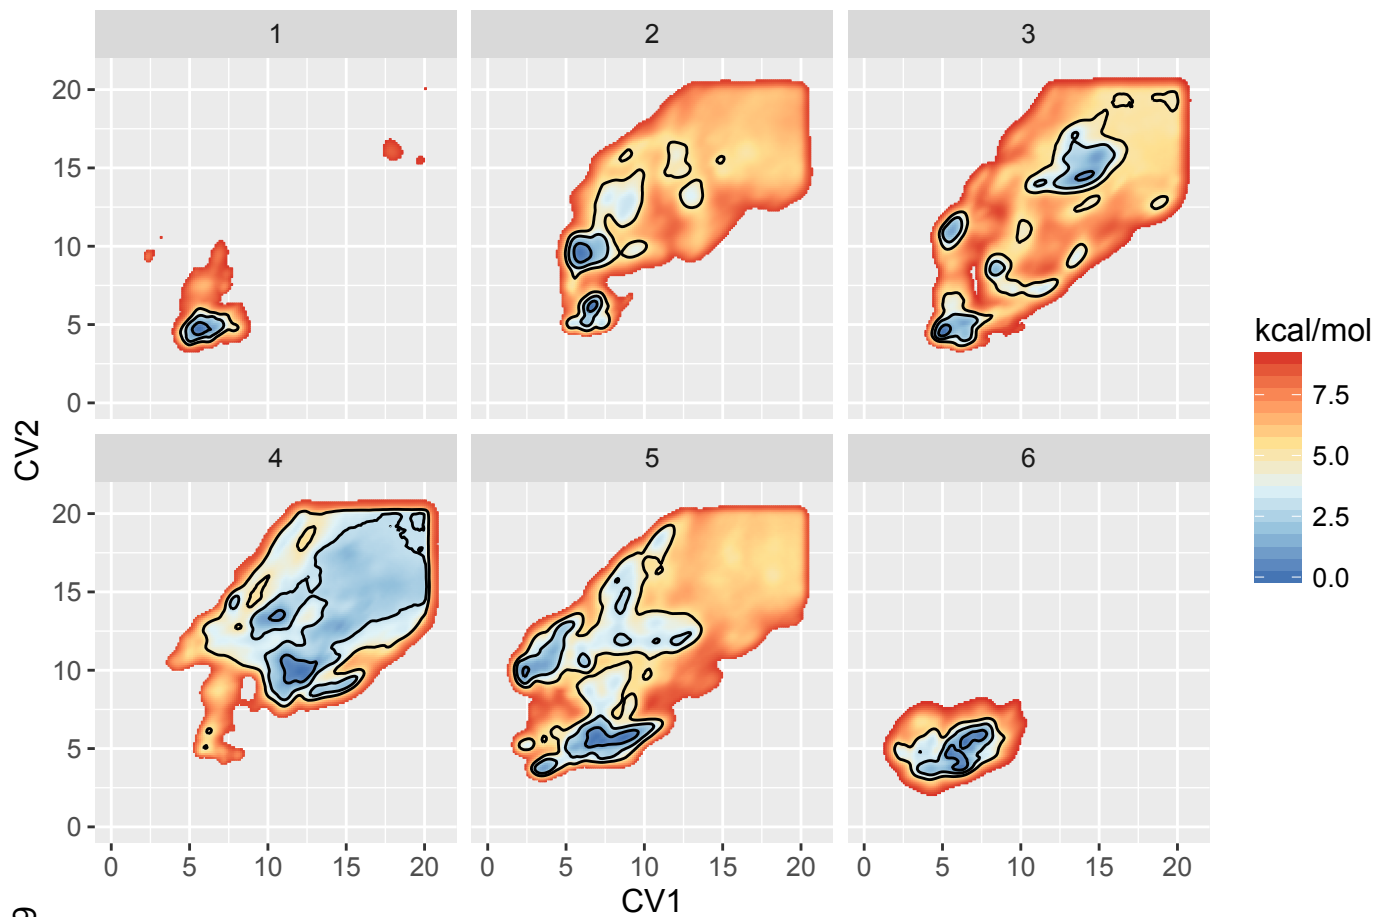

**b**

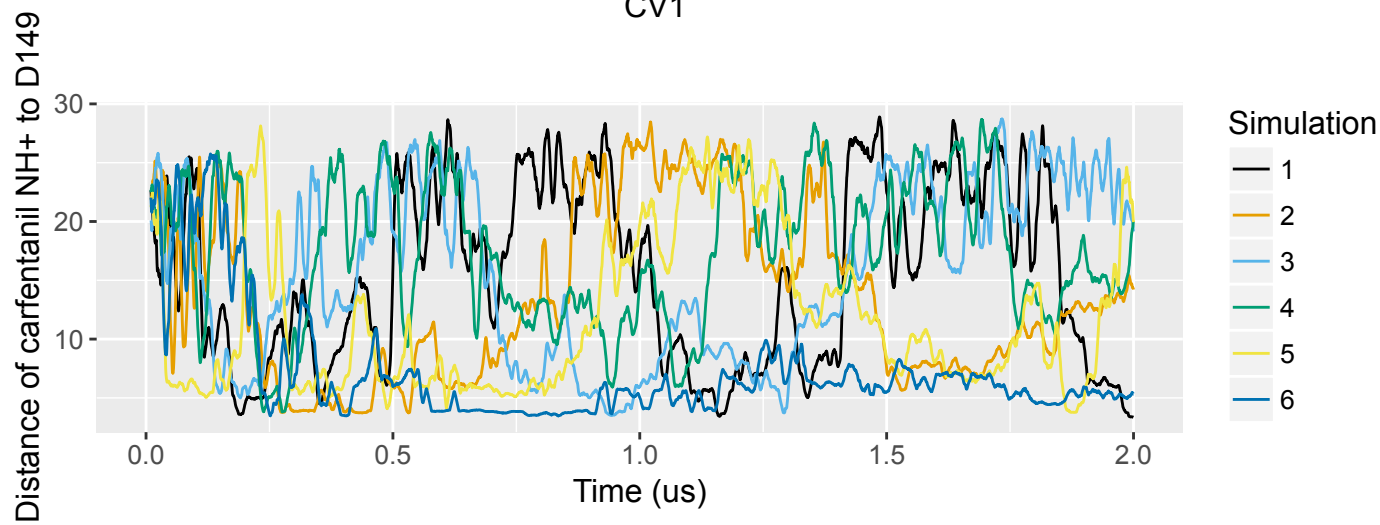

Supplement: pcbi.1007394.s006.pdf [file pcbi.1007394.s006.pdf]
